# Supplementary material for: Dynamic temperature-sensitive A-to-I RNA editing in the brain of a heterothermic mammal during hibernation
Source: bioRxiv preprint, doi:10.1101/288159, version 1 (2018-03-23)
Supplement: Supplementary Materials [file 288159-3.xlsx]

## Sheet: Description
Columns

## Sheet: Cold-Enriched Sites
edit_type

## Sheet: Constitutive Sites
Region
